# Supplementary material for: Enhanced cellular uptake and photochemotherapeutic potential of a lipophilic strained Ru(ii) polypyridyl complex
Source: PubMed Central journal article supplement — RSC Adv. 2019 Jun 3;9(30):17254–65. doi: 10.1039/c9ra02615k (PMC9064604; doi:10.1039/c9ra02615k), 2019-06-03
Supplement: RA-009-C9RA02615K-s001.pdf [file RA-009-C9RA02615K-s001.pdf]

## Electronic Supporting Information (ESI)

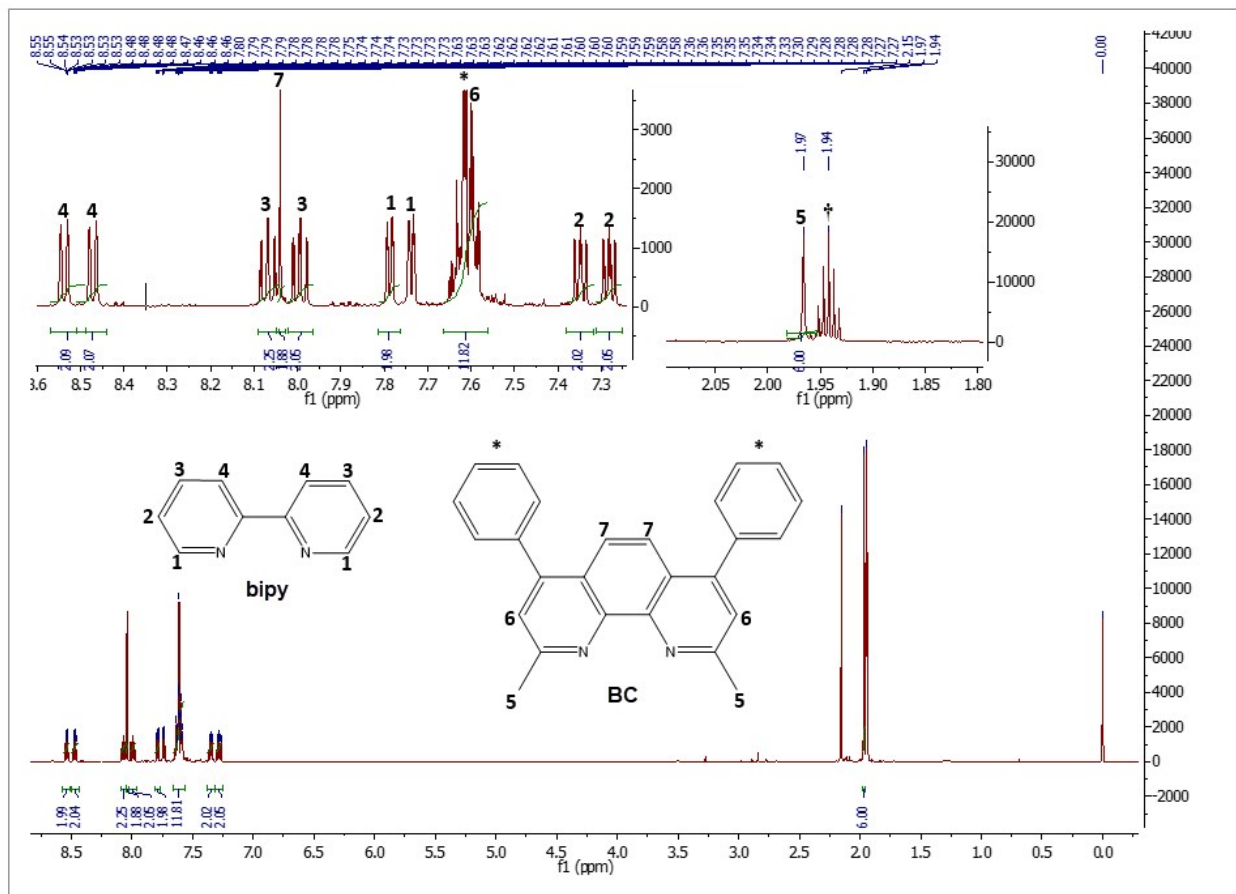

Figure S1. <sup>1</sup>H NMR spectra of complex 1 CD<sub>3</sub>CN. The chemical shifts are expressed in ppm. The chemical structures represented belong to the coordinating ligands 2,2'-bipyridine (bipy) and bathocuproine (BC). The hydrogens are labeled by numbers and are assigned to the peaks on the spectra. \* represents the hydrogens on the phenyl groups which are detected as a multiplets on the spectrum and † represents the solvent residual peaks. The peak at 0 corresponds to TMS.

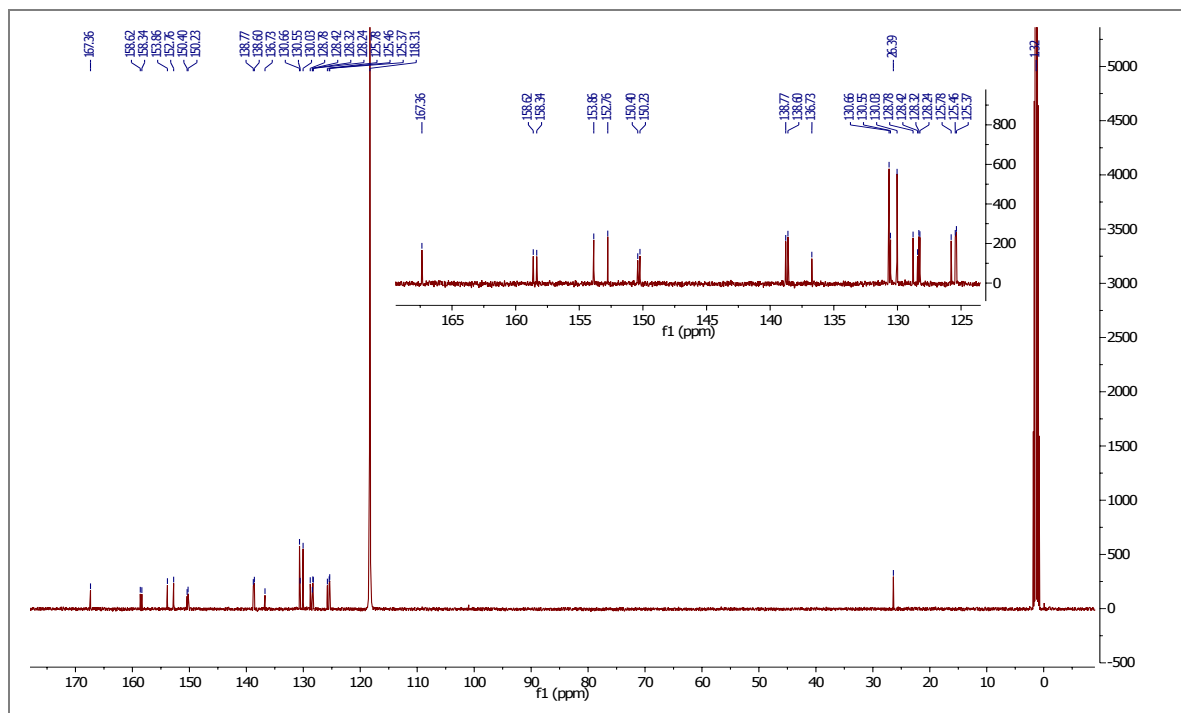

Figure S2.  $^{13}\text{C}$  NMR spectra of complex **1** in  $\text{CD}_3\text{CN}$ . The chemical shifts are expressed in ppm and the characteristic peaks for the complex are at  $\delta = 167.36, 158.62, 158.34, 153.86, 152.76, 150.40, 150.23, 138.77, 138.60, 136.73, 130.66, 130.55, 130.03, 128.78, 128.42, 128.32, 128.24, 125.78, 125.46, 125.37, 26.39$ .

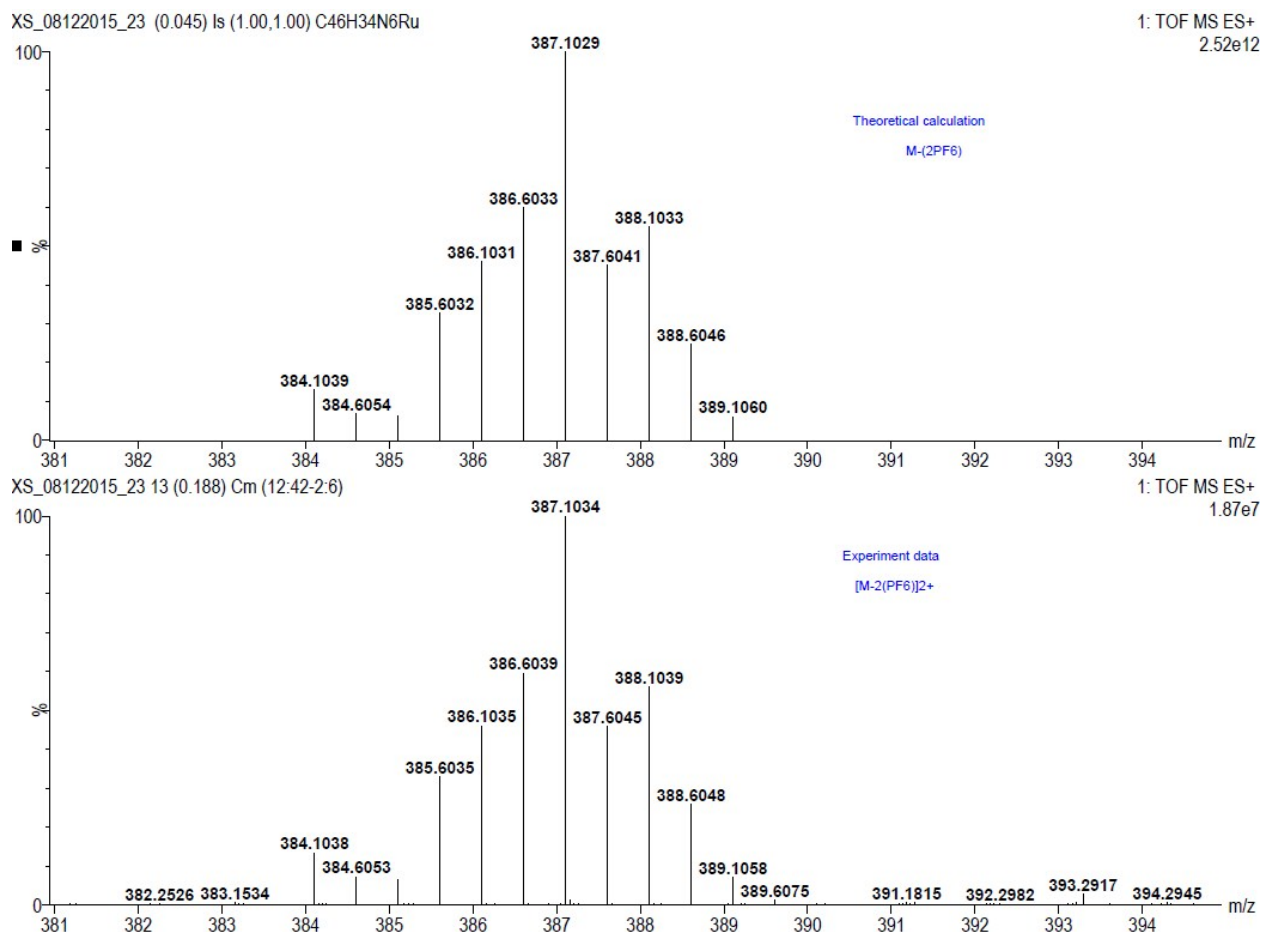

Figure S3. HRMS of complex 1. The  $m/z$  value is assigned to the peaks and the y axis represents the percent abundance of the signals (%). The exact mass of the counter-ion free complex  $[M-2(PF_6)]^{2+}$  was found to 387.1034 as compared to 387.1029 which is the theoretical mass.

TOF/TOF™ Reflector Spec #1 MC[BP = 773.1, 29350]

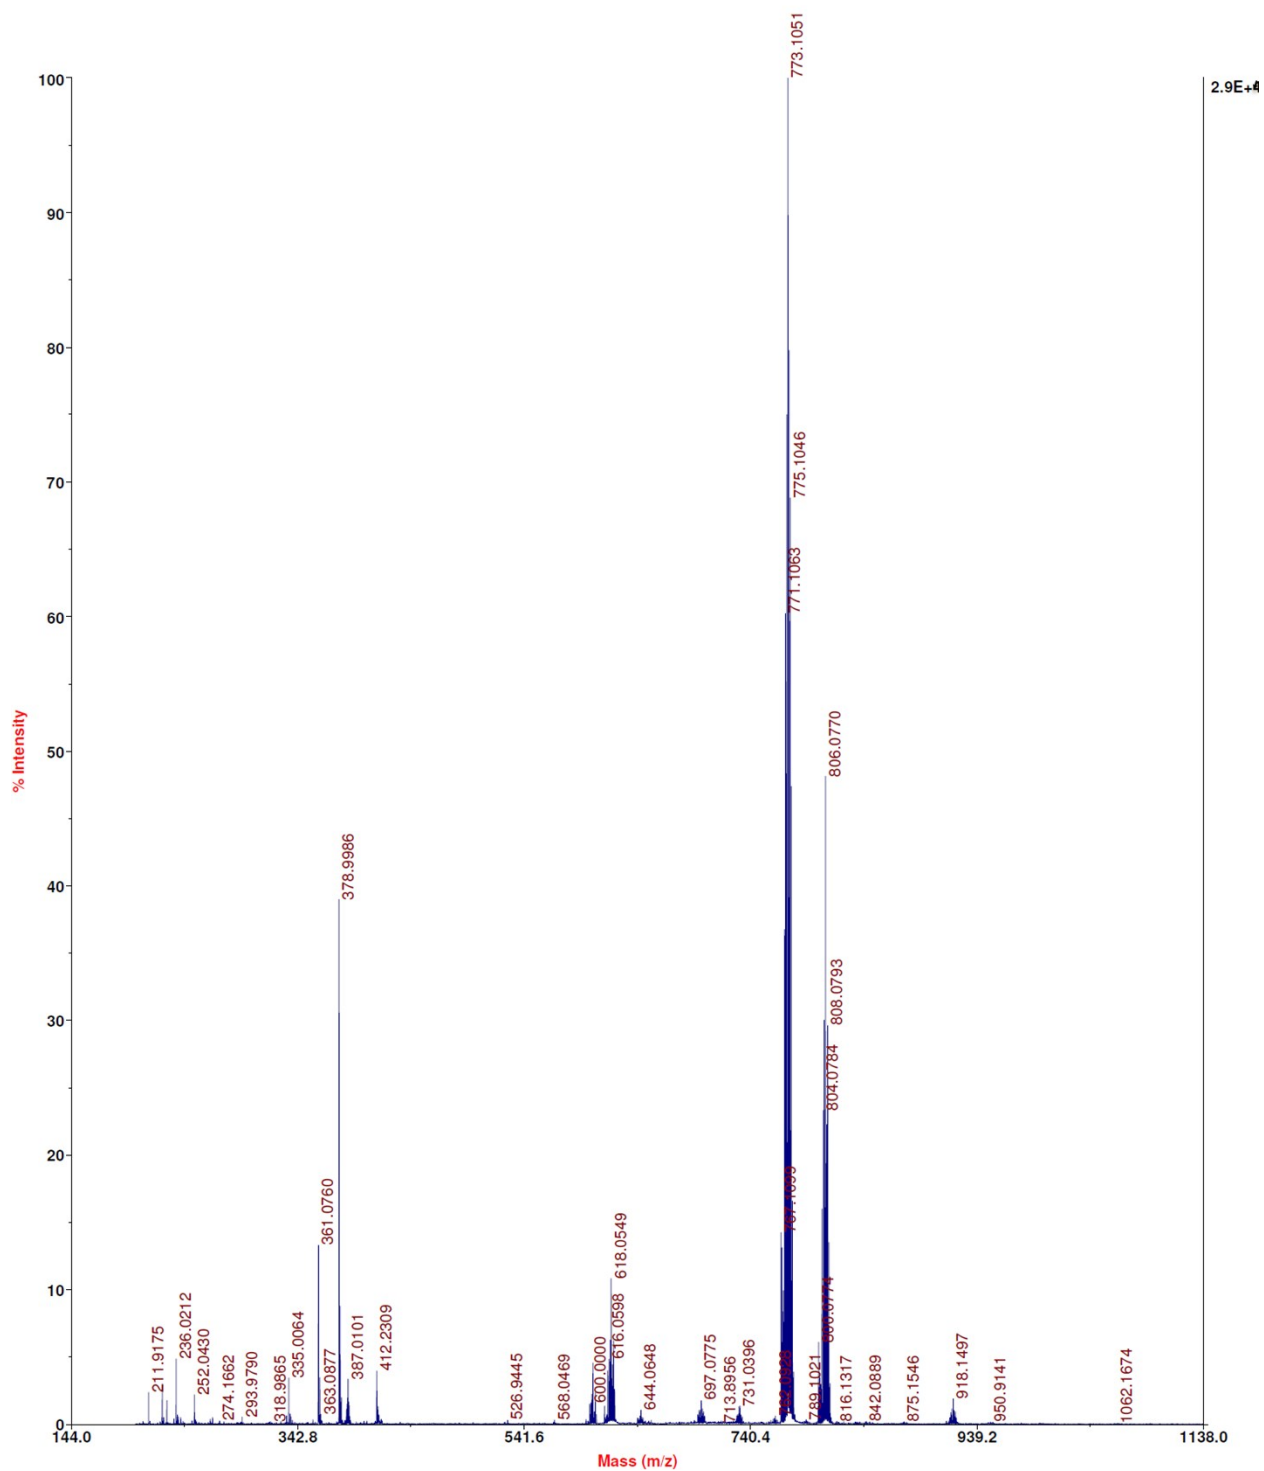

Figure S4. MALDI spectrum of complex **1**. The m/z value is assigned to the peaks and the y axis represents the percent intensity of the signals (%). The complex was detected as  $[\text{Ru}(\text{bipy})_2(\text{BC}) - \text{H}^+]^+$  at  $m/z = 773.1$ .

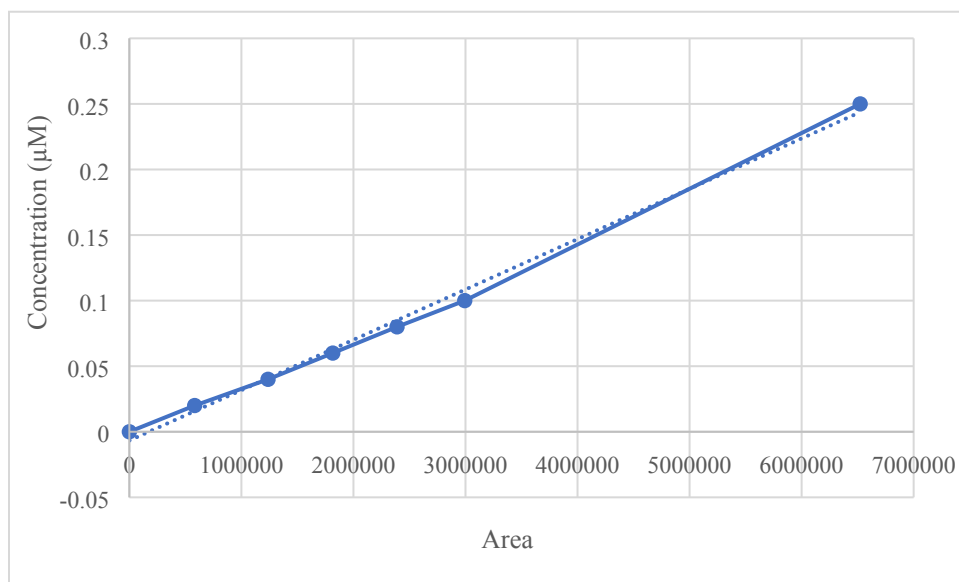

Figure S5. LC-MS/MS calibration curve of  $[\text{Ru}(\text{bipy})_2\text{BC}]\text{Cl}_2$ .

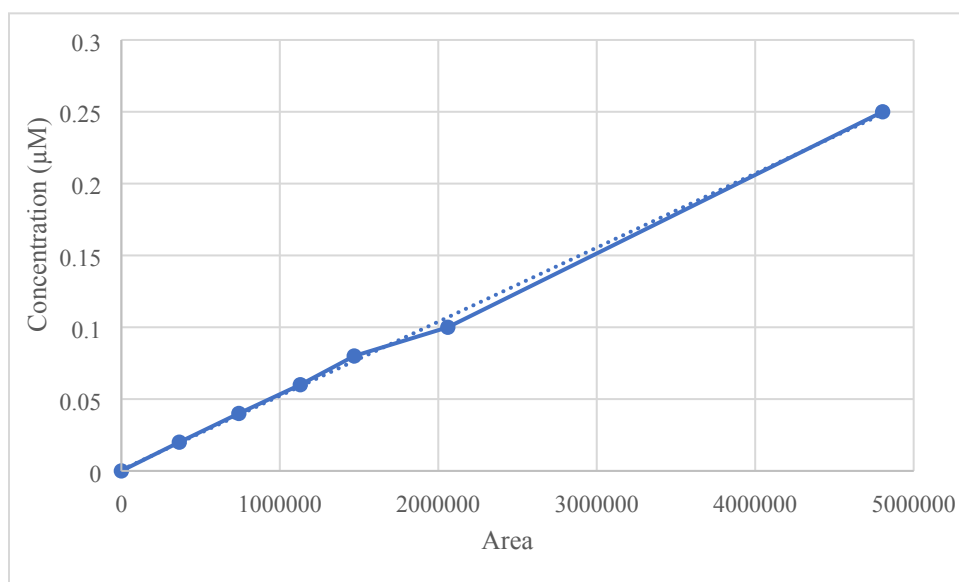

Figure S6. LC-MS/MS calibration curve of  $[\text{Ru}(\text{bipy})_2\text{phen}]\text{Cl}_2$ .  $y = 5.16\text{E-}08x + 6.55\text{E-}04$ ;  $R^2 = 0.998$ .

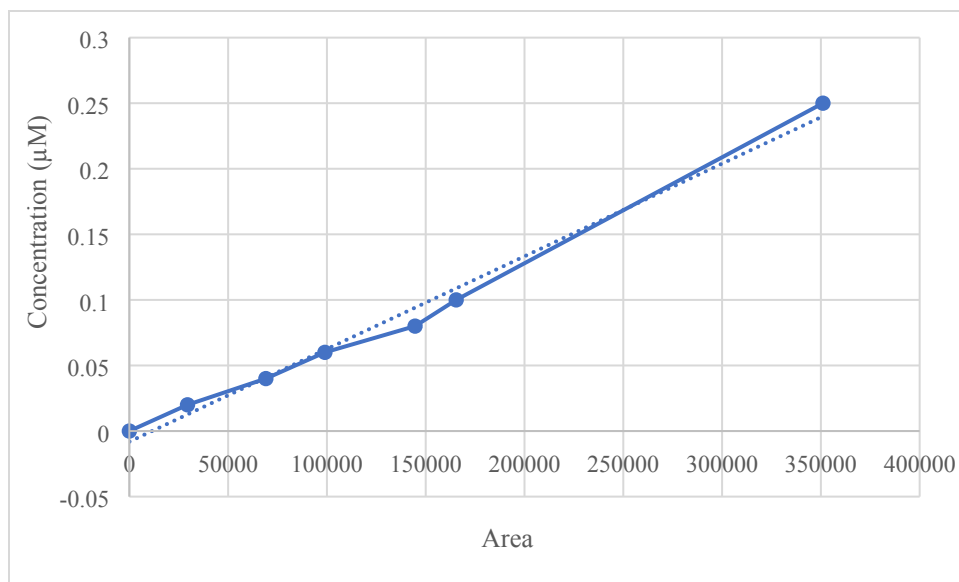

Figure S7. LC-MS/MS calibration curve of BC.  $y = 7.07E-07x - 8.12E-03$ ;  $R^2 = 0.988$ .

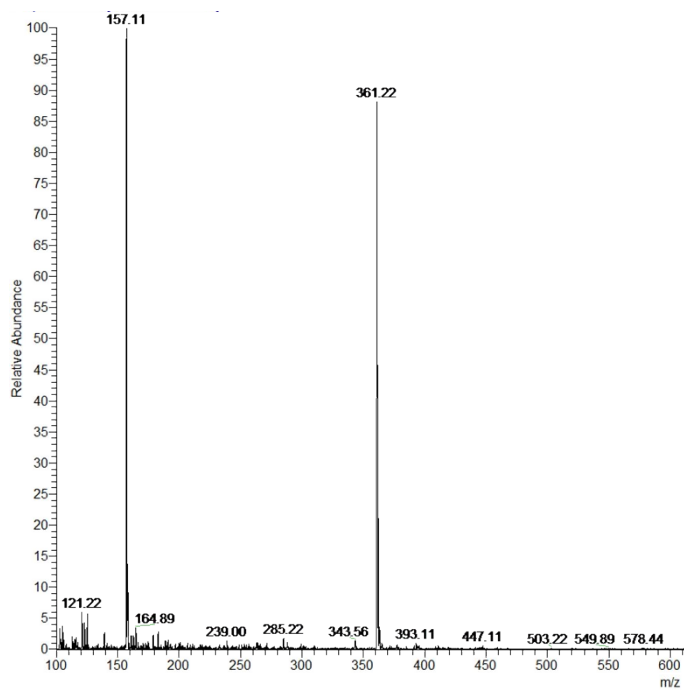

Figure S8. ESI-MS full scan spectrum of 1:1 bipy:BC mixture. bipy:  $m/z [M + H]^+ = 157.11$ , BC:  $m/z [M + H]^+ = 361.22$ .

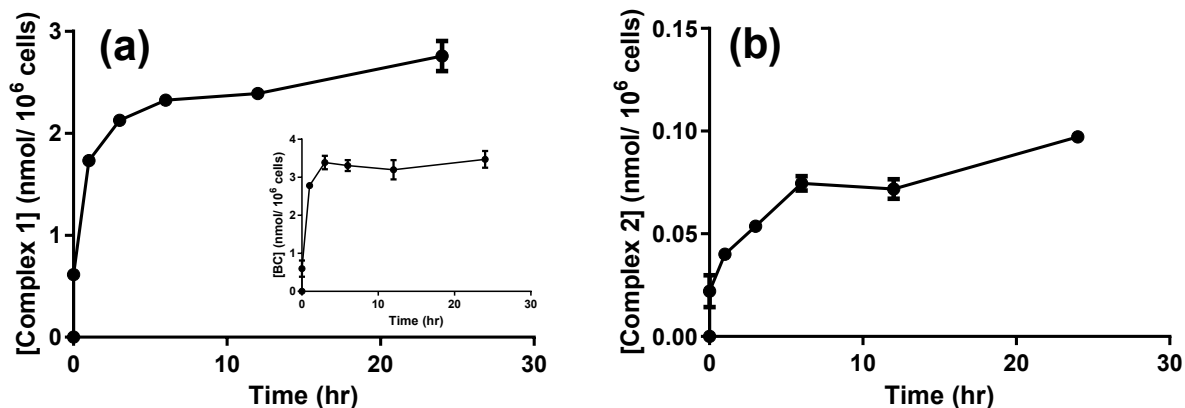

Figure S9. LC-MS/MS analysis for the uptake of complex 1 (a), BC (a, inset), and complex 2 (b) by A549 cells. Results are averages of four different experiments ( $\pm$ SEM) and are expressed in nmol/ 10<sup>6</sup> cells, as estimated from the calibration curves (Figures S5, S6, and S7).

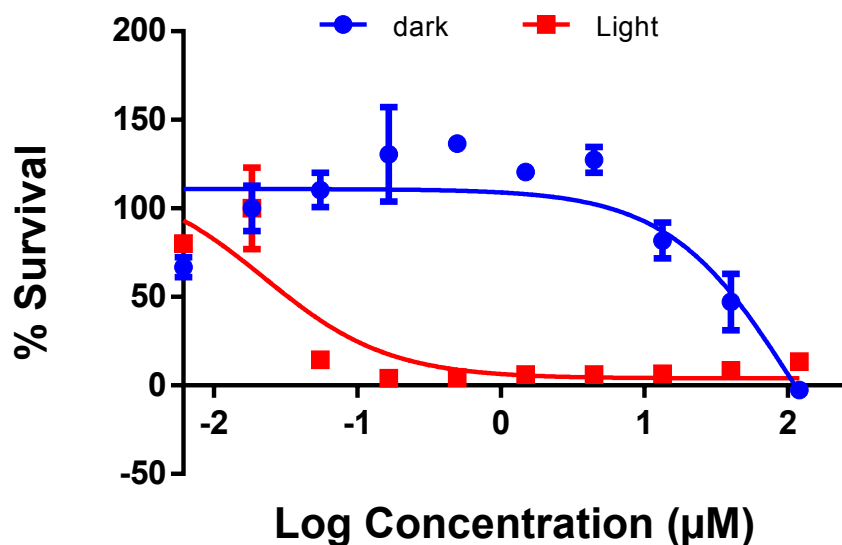

Figure S10. Effect of complex 1 on the survival of MSCs. Treatment was performed with 3-fold dilutions of the complex starting at 120  $\mu$ M. Cytotoxicity was evaluated in both dark and light conditions (blue LED at a power of 100 mW/cm<sup>2</sup>) and the experiment was repeated three times, with measurements performed in triplicates. IC<sub>50</sub> (Dark) = 52  $\pm$  13  $\mu$ M, IC<sub>50</sub> (Light) = 0.024  $\pm$  0.002  $\mu$ M,  $p < 0.05$ . The graph shown here corresponds to a single representative trial.
